# Supplementary material for: How the kinetic behavior of organic chickens affects productive performance and blood and meat oxidative status: a study of six poultry genotypes
Source: PubMed Central journal article supplement — Poult Sci. 2021 May 30;100(9):101297. doi: 10.1016/j.psj.2021.101297 (PMC8319010; doi:10.1016/j.psj.2021.101297), 2021-05-30

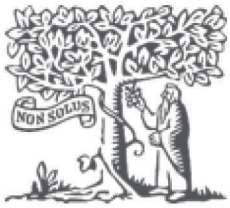

ELSEVIER

# Certificate of Elsevier Language Editing Services

**The following article was edited by Elsevier Language Editing Services:**

**"How the kinetic behaviour of organic chickens affects productive performers, blood and meat oxidative status? Focus on six different poultry genotypes"**

**Authored by:  
Simona Mattioli**

Date: 09-Feb-2021

Serial number: LE-205736-7908E2DAF9A6

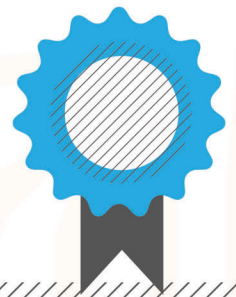

Supplement: mmc2.pdf [file mmc2.pdf]
